# Supplementary material
Source: PubMed Central journal article supplement (PMC3601777)
Supplement: NIHMS449472-supplement-1_si_001.pdf [file NIHMS449472-supplement-1_si_001.pdf]

***Supporting Information for***

**Ultra-Thin Optically Transparent Carbon Electrodes Produced  
from Layers of Adsorbed Proteins**

Sarah A. Alharthi, Tomas E. Benavidez and Carlos D. Garcia

Department of Chemistry, The University of Texas at San Antonio

One UTSA Circle, San Antonio, TX 78249, USA

## Electrochemical and Spectroscopic Characterization

The influence of the scan rate was investigated in the 0.005 – 0.3 V/s range and using electrochemical couples of either negative ( $\text{K}_3\text{Fe}(\text{CN})_6$ ) or positive charge ( $\text{Ru}(\text{NH}_3)_6\text{Cl}_3$ ). Figure 1 shows the linear relationships between the peak current and the square root of the scan rate, obtained from representative voltammograms.

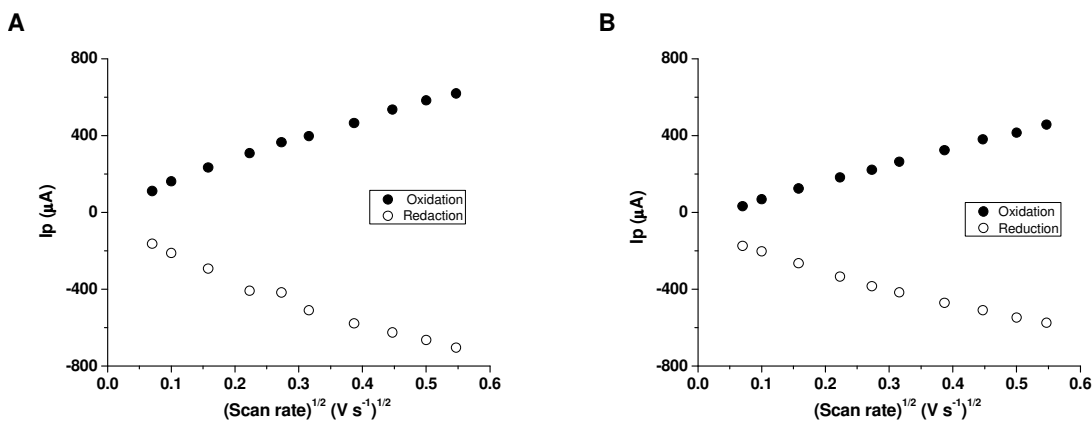

Figure 1. Dependence of the peak current ( $I_p$ ) as a function of the square root of the scan rate obtained with the OTCE fabricated with 12 layers of protein adsorbed/pyrolyzed for  $\text{K}_3\text{Fe}(\text{CN})_6$  (A) and  $\text{Ru}(\text{NH}_3)_6\text{Cl}_3$  (B). Conditions: 1 mM for each electrochemical couple in 0.1 M  $\text{NaH}_2\text{PO}_4/\text{Na}_2\text{HPO}_4$  buffer + 0.1M KCl, pH = 7.4.

As it can be observed in Figure 2, significant shifts in the  $\Delta E_p$  were observed as the sweep rate increased.

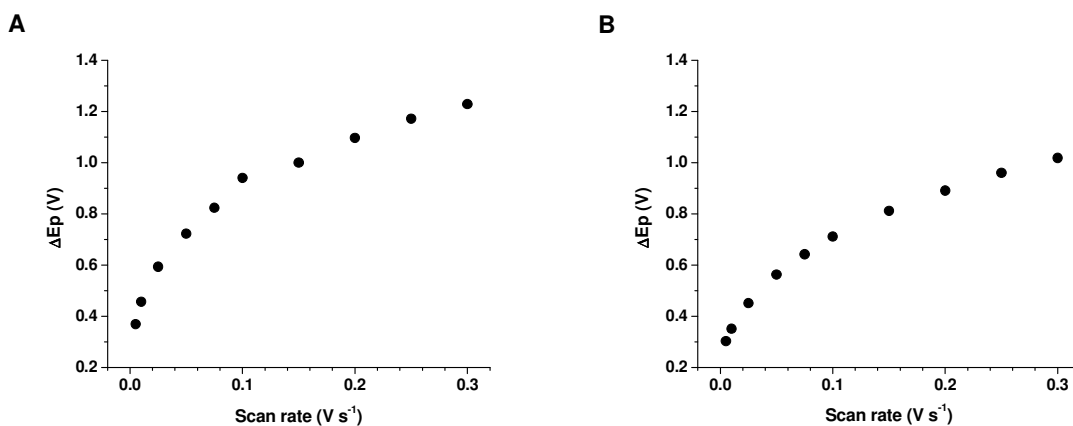

Figure 2. Dependence of the peak potential difference ( $\Delta E_p$ ) as a function of the scan rate obtained with the OTCE fabricated with 12 layers of protein adsorbed/pyrolyzed for  $\text{K}_3\text{Fe}(\text{CN})_6$  (A) and  $\text{Ru}(\text{NH}_3)_6\text{Cl}_3$  (B). Conditions: 1 mM for each electrochemical couple in 0.1 M  $\text{NaH}_2\text{PO}_4/\text{Na}_2\text{HPO}_4$  buffer + 0.1M KCl, pH = 7.4.

The reproducibility of the proposed method was evaluated by evaluating the peak current (either anodic or cathodic wave) obtained for three electrodes, independently prepared. The results are included in Figure 3.

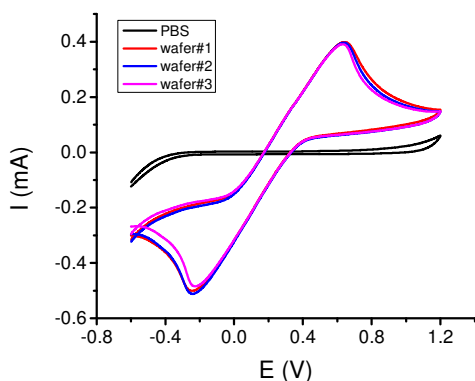

Figure 3. Electrodynamic profiles obtained with 3 electrodes fabricated with 12 layers of protein adsorbed/pyrolyzed. Conditions: 1.0 mM  $K_3Fe(CN)_6$  in 0.1 M  $NaH_2PO_4/Na_2HPO_4$  buffer + 0.1 M KCl, pH = 7.4, scan rate:  $100\text{ mV}\cdot\text{s}^{-1}$ .

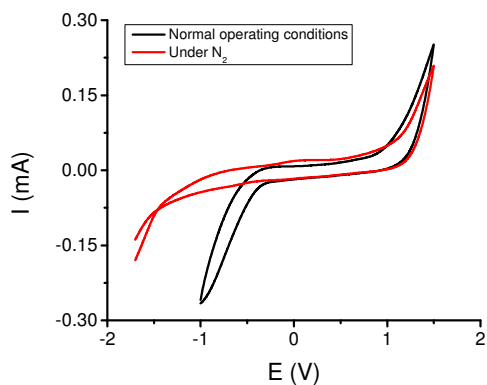

Figure 4: Electrodynamic profiles obtained with an electrode fabricated with 12 layers of protein adsorbed/pyrolyzed. Conditions: 0.1 M  $NaH_2PO_4/Na_2HPO_4$  buffer + 0.1 M KCl, pH = 7.4, scan rate:  $100\text{ mV}\cdot\text{s}^{-1}$ .

As shown in Figure 4, the operational limits of the electrode were defined between -0.5 V and 1.2 V, avoiding hydrogen and oxygen evolution (under normal operational conditions). When the CV experiments were performed in a deoxygenated solution the onset for reduction wave of oxygen was found at approximately -1.5 V. These values are in good agreement with previously reported OTCE (for example, *Anal. Chem.* 49 (1977) 1395).
